# Supplementary material for: Enhanced visible-light photocatalytic degradation of methylene blue via a ternary Ag 2 O@CuFe 2 O 4 @g-C 3 N 4 Z-scheme heterojunction with synergistic Fenton-like reactivity for sustainable water remediation
Source: Royal Society of Chemistry journal article supplement (doi:10.1039/d5ra02882e), 2025-01-01
Supplement: d5ra02882e1.pdf [file d5ra02882e1.pdf]

## Supporting Information

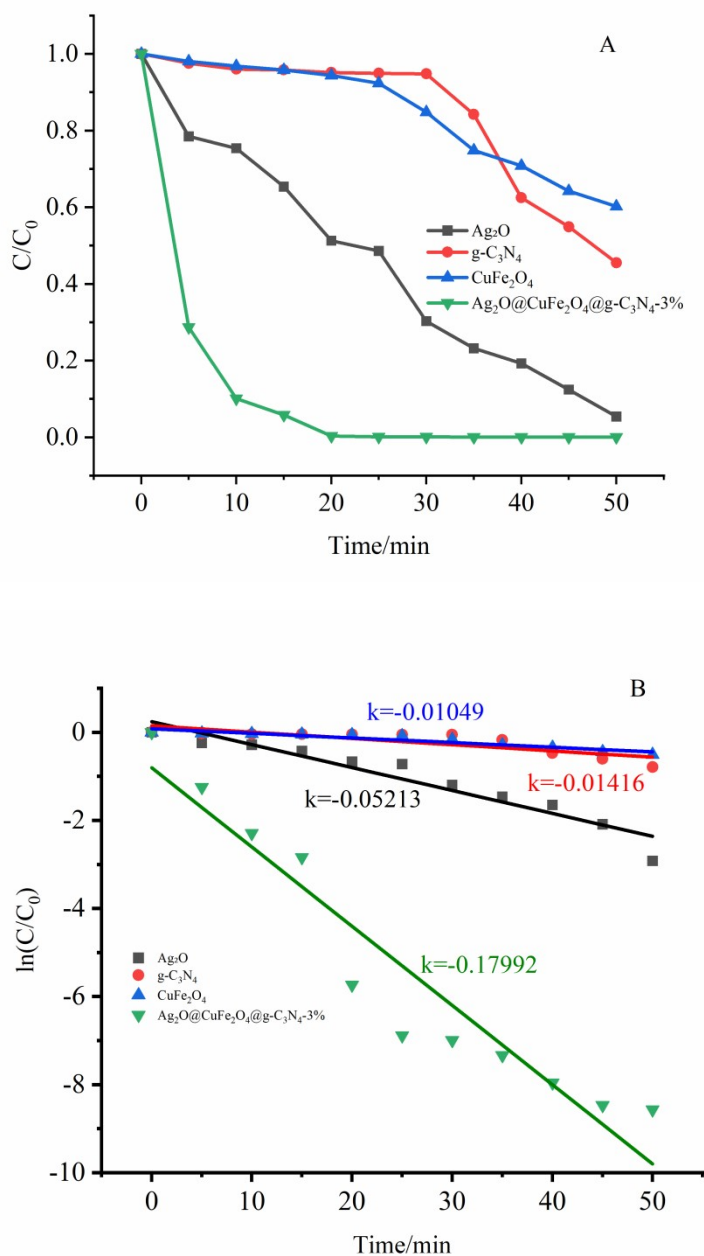

Fig. S1 The degradation curves of MB under visible lights change of (A) degradation rate, (B) kinetic plots with irradiated time.
